# Supplementary material for: To aggregate or not to aggregate high-dimensional classifiers
Source: Springer Nature journal article supplement (doi:10.1186/1471-2105-12-153), 2011-05-13
Supplement: 12859_2010_4530_MOESM2_ESM.pdf [file 12859_2010_4530_MOESM2_ESM.pdf]

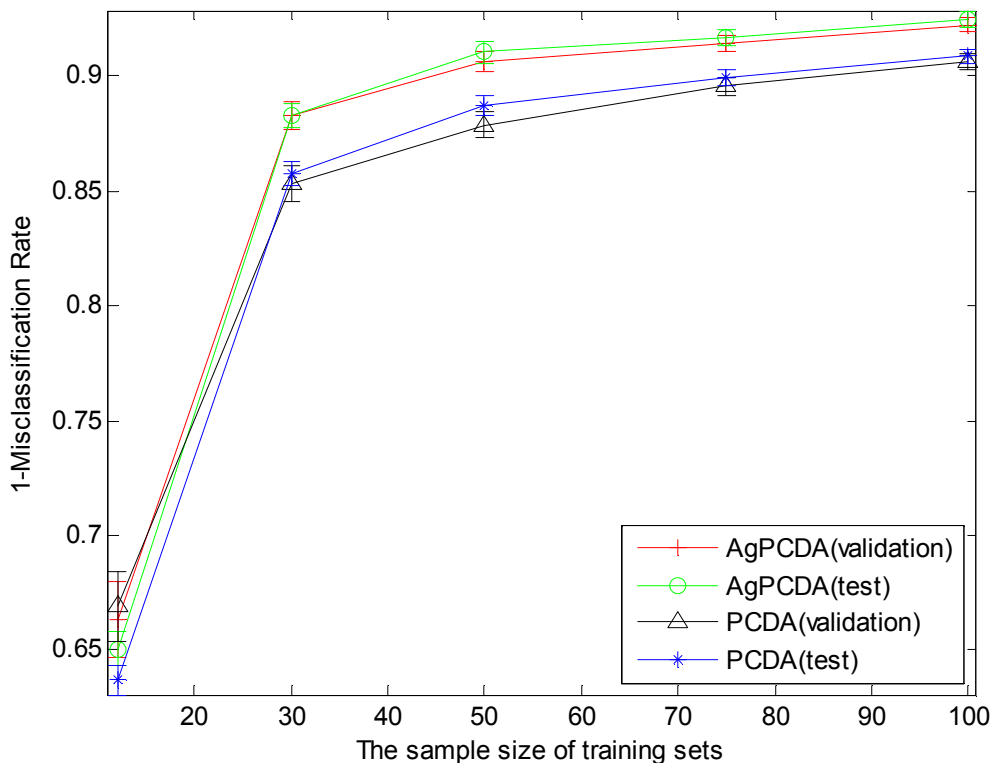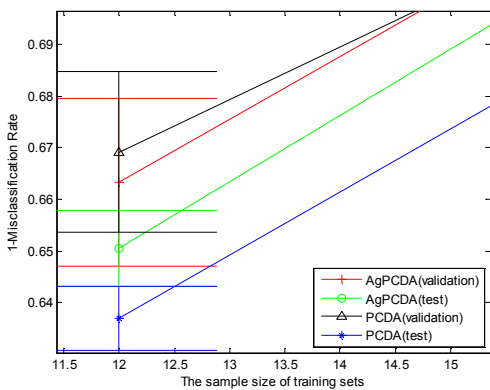

(zoomed)

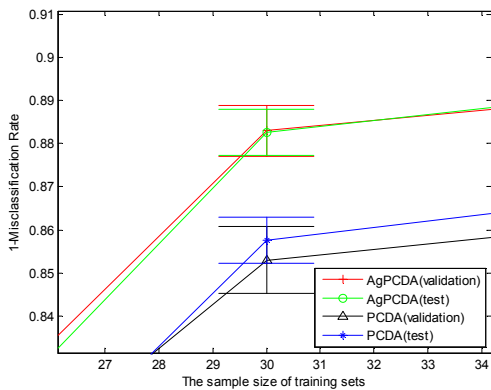

(zoomed)
